# Supplementary material for: Mutations in SLC39A14 disrupt manganese homeostasis and cause childhood-onset parkinsonism–dystonia
Source: PubMed Central journal article supplement (PMC4894980; doi:10.1038/ncomms11601), 2016-05-27
Supplement: ncomms11601-s1.pdf [file ncomms11601-s1.pdf]

## Supplementary Figures

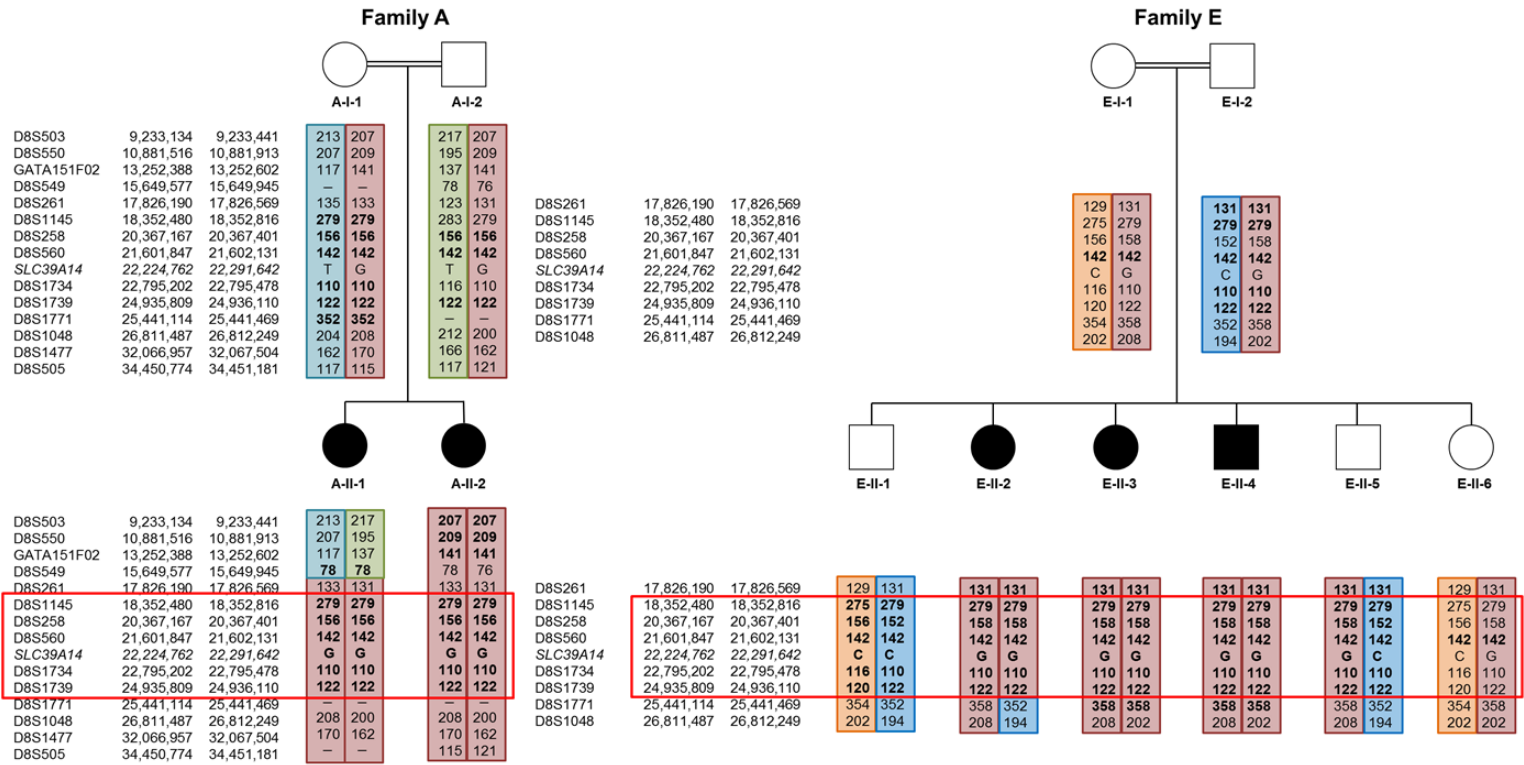

**Supplementary Figure 1. Microsatellite marker linkage analysis on chromosome 8 in Family A and Family E.** *SLC39A14* is located at 8p21.3. Microsatellite markers are positioned according to physical distance (measured in Mb; localisation according to NCBI build 36.3). Haplotypes for these markers are shown, and the disease-associated haplotypes are boxed in pink. Green, blue, and orange boxes indicate non-disease associated haplotypes. All affected children of each family share a common homozygous haplotype in this region (indicated by the pink boxes).

Human MKLLLLHPAQSCLLLLLLGLWRTTPEAHASSLGPAPISAASFLQDLIHRYGEGDSLTLQ 60  
 Chimpanzee --MKLLLLHPAQSCLLLLLLGLWRTTPEAHASSPAPISAASFLQDLIHRYGEGDSLTLQ 58  
 Mouse --MKRLLHPALPSCLLLLVLFGIWRTAPQTHASSAGLPPLSATSFLEDLMDRYGKNDSTLTL 58  
 Chicken -----MANPAVLLLLLSLRVPA-----GSDAVLPQLSAASFVQDLLRRYGGGEALSLE 49  
 Zebrafish MTLRRASGCRQLTTLTIGLALTGLLQWPIGDVVRGQDGASPAQVLQELLRTRYGDNASISVP 60  
 . \* : \* : . \* : : : \* : \* \* . : : :

Human QLKALLNHLVDVGVGRNVTPHVGQHRNLSTCFSSGDLFTAHNFSEQSRIGSSELQEFCPT 120  
 Chimpanzee QLKALLNHLVDVGVGRNVTPHVGQHRNLSTCFSSGDLFTAHNFSEQSRIGSSELQEFCPT 118  
 Mouse QLKALLNHLVDVGVGRNVTPHVGQHRNLSTCFSSGDLFAAHLNLESRQIGASEFQEFCPT 118  
 Chicken QLKALLNRLVDVGVGRNSGRP---HANLSRCFSSAELFAVHNLSEGSVLGAAELRAFPA 106  
 Zebrafish QLRSLLVRLNGGQSEDHDSKTQPTRTNASKCLA-ADTLAVYGMSEQSRIDRGLQICPT 119  
 \*\*:\* : \* . \* . . : : \* \* \* : : . : : : \* \* \* . : : : \* : \* :

Human ILQQLDSRACTSENQENEENEQEETEGRPSAVEVWVGFGLSVSLINLASLLGLVLPCTEK 180  
 Chimpanzee ILQQLDSRACTSENQENEENEQEETEGRPSAVEVWVGYGLLCVTIISLCSLLGASVVPFKK 178  
 Mouse ILQQLDSQACTSENQKSEENEQEETEGRPSAIEVWVGYGLFVTVIISLCSLMGASVVPFKK 178  
 Chicken VLQQLSAAACAENLENEENEQEETEGRPSAAEVWVGFGLSVSMINVASLLGLLIVPCTRK 166  
 Zebrafish MIQQLDSQACKTQ--PNQSESSP--RPTEAEVWVGYSILSVTLVSFAFALTGVFVPLMRT 175  
 : \* \* \* : \* \* \* : : . : \* . \* : : \* : \* \* \* : : \* . : : : \* \* : \* \* : . .

Human AFFSRVLTFFIALLSIGTLLSNALFQLIPEAFGFNFLEDYVYVSKSAVVFGGFYLVFFFTEKI 240  
 Chimpanzee TFYKRLLLYFIALAIGTLYSNALFQLIPEAFGFNFLEDYVYVSKSAVVFGGFYLVFFFTEKI 238  
 Mouse TFYKRLLLYFIALAIGTLYSNALFQLIPEAFGFNF--QDNYVSKSAVVFGGFYLVFFFTEKI 237  
 Chicken AFFSRILTFIALLSIGTLLSNALFQLIPEAFGFNFQEDYVYVSKSAVVFGGFYLVFFFTEKI 226  
 Zebrafish RFMRRVLVYFIALSIGTLLSTAILQLIPEAFGFDMEDYVYPKSAVVFGGFYLVFFFTEKI 235  
 \* \* : \* : \* : \* : \* \* \* . \* : \* : \* : \* : \* : \* \* : \* : \* \* : \* : \* : \* : \* : \* :

Human LKILLKQKNE--HHHGHSYASESLP-SKKDQEEGVMEKLQNGDLD-HMIPQHCSEL DG 296  
 Chimpanzee LKILLKQKNE--HHHGHSYASESLP-SKKDQEEGVMEKLQNGDLD-HMIPQHCSEL DG 294  
 Mouse LKMLLKQKNE--HHHGHNHFSETLP-SKKDQEEGVTEKLQNGDLD-HMIPQHCSEL DG 293  
 Chicken LKMLLKQKDP--HHHGHSYSTALP-SRKDREEGVTEKLQNGDLD-HMIP-HVANEMEC 281  
 Zebrafish LKMILPKDGTGGHGHGSHFPAERYANSNGDLEDGVMEKLQNGEAGGALP---RAEADG 292  
 \* : \* \* : \* : \* : \* : \* : \* : \* : \* : \* : \* : \* : \* : \* : \* : \* : \* : \* : \* : \* : \* :

Human KAPMVDEKVIIVGSLSVQDLQAS----QSACYWLGKGVRYSDIGTLAWMITLSDGLHNFIDG 352  
 Chimpanzee KAPMVDEKVIIVGSLSVQDLQAS----QSACYWLGKGVRYSDIGTLAWMITLSDGLHNFIDG 350  
 Mouse KAPGTDEKVIIVMSMSVQDLQAS----QSACYWLGKGVRYSDIGTLAWMITLSDGLHNFIDG 349  
 Chicken KSPPGDEKVVVGSLSVQDLQAS----QSACYWLKEVRYSDIGTLAWMITLSDGLHNFIDG 337  
 Zebrafish RGVGEDDKMLSTGQTVQDTQSSGGGTGGCYWLGKRAYSDIGTLAWMITLSDGLHNFIDG 352  
 : . \* : \* : . : \* \* \* : \* \* . \* : \* \* \* \* \* \* \* \* \* \* \* \* \* \* \* \* \* \* \* \* \* \* \* \* \* \*

Human LAIGASFVTSVFQGISTSVAILCEEFPHELD FVILLNAGMSIQQALFFNFLSACCCYLG 412  
 Chimpanzee LAIGASFVTSVFQGISTSVAILCEEFPHELD FVILLNAGMSIQQALFFNFLSACCCYLG 410  
 Mouse LAIGASFVTSVFQGISTSVAILCEEFPHELD FVILLNAGMSIQQALFFNFLSACCCYLG 409  
 Chicken LAIGASFVTSVFQGISTSVAILCEEFPHELD FVILLNAGMTIRQALFFNFLSACCCYVG 397  
 Zebrafish LAIGASFASVTFQGISTSVAILCEEFPHELD FVILLNAGMSIQQALFFNFLSACCCYLG 412  
 \* \* \* \* \* . \* \* \* \* \* \* \* \* \* \* \* \* \* \* \* \* \* \* \* \* \* \* \* \* : \* \* \* \* \* \* \* \* \* \* \* \* \* :

Human LAFGILAGSHFSANWIFALAGGMFLYISLADMFPENNEVCQEDERKGS--ILIPFIQN 470  
 Chimpanzee LAFGILAGSHFSANWIFALAGGMFLYISLADMFPENNEVCQEDERKGS--ILIPFVIQN 468  
 Mouse LAFGILAGSHFSANWIFALAGGMFLYIALADMFPENNEVCQEDKNS--FLVPFVIQN 467  
 Chicken LAFGIVAGSHFSANWIFALAGGMFLYIALADMFPENNEVSREDEQNGS--ALITFAIQNA 455  
 Zebrafish MGFILAGNNFSPNWI FALAGGMFLYIALADMFPENNEVSREEEAAGSGFLLT FALQNA 472  
 . \* \* \* : \* : \* \* . \* \* \* \* \* \* \* \* \* \* \* \* \* \* \* \* \* : \* : \* . . - \* : \* : \* \*

Human GLLTGFTIMVVLTMYSGQIQIG 492  
 Chimpanzee GLLTGFTIMVVLTMYSGQIQIG 490  
 Mouse GLLTGFTIMVVLTMYSGQIQIG 489  
 Chicken GLLTGFTIMVLLTMYSGQIQIG 477  
 Zebrafish GLLTGFAIMVLTIYSQIQIG 494  
 \* \* \* \* \* . \* \* : \* \* : \* \* \* \* \* : \*

**Supplementary Figure 2. Evolutionary conservation data for SLC39A14 Isoform 2.** ClustalW software (<http://www.ebi.ac.uk/Tools/msa/clustalw2/>) was used to generate the alignment. Residues identical to the human *SLC39A14* sequence are marked with an asterisk (\*). Conservation between amino acids of strongly and weakly similar properties is indicated by a colon (:), and a period (.), respectively. Putative protein domains are highlighted and include a signalling peptide (position 1-30; purple; numbering according to the human protein

sequence), eight transmembrane domains (position 156-177, 186-211, 225-245, 337-359, 365-389, 397-420, 427-450, 465-487; grey), a histidine-rich region (position 251-257, turquoise), and the LZT consensus motif (375-384; turquoise). Amino acids affected by missense mutations are highlighted in yellow (F98V, G383R, N469K) and those pertaining to truncating mutations in green (E105X, S160Cfs\*5). The site of the CRISPR induced mutation in zebrafish is indicated in red (P210Hfs\*48). Protein sequences used to generate this alignment are NP\_056174.2 (human), XP\_531112.3 (chimpanzee), NP\_659057.2 (mouse), XP\_427108.3 (chicken), and XP\_005171823.1 (zebrafish).

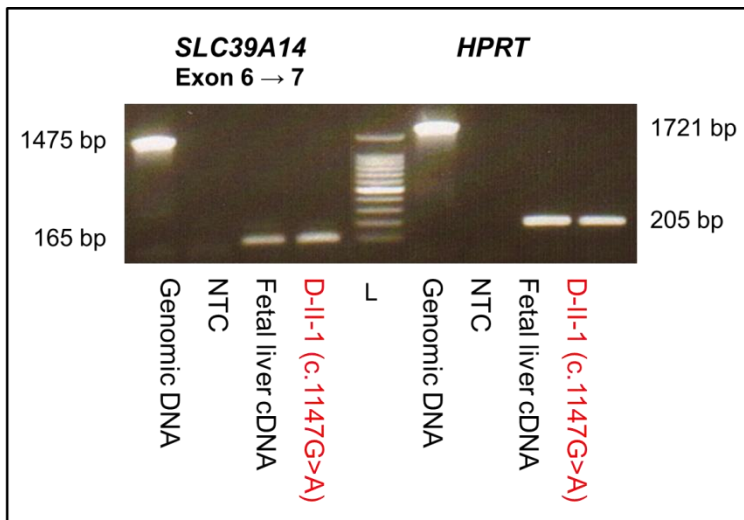

**Supplementary Figure 3. The c.1147G>A mutation does not affect normal splicing.** RT-PCR on liver cDNA from individual D-II-1 produces a single band of 165 bp confirming normal mRNA splicing. Fetal liver, shown to express *SLC39A14* (**Fig. 2c**), was used as a control sample. Primers used span *SLC39A14* exon 6 (5' GTGCTTCCTTCACTGTGTCA 3') and exon 7 (5' CGTTGAGCAGGATGACAAAG 3'). Genomic and unspliced cDNA are predicted to generate a 1475 bp amplicon, whilst normally spliced cDNA produces a 165 bp amplicon. Hypoxanthine-guanine phosphoribosyltransferase (HPRT) was used as a housekeeping control gene. L, 100 bp ladder (Promega). NTC, non-template control.

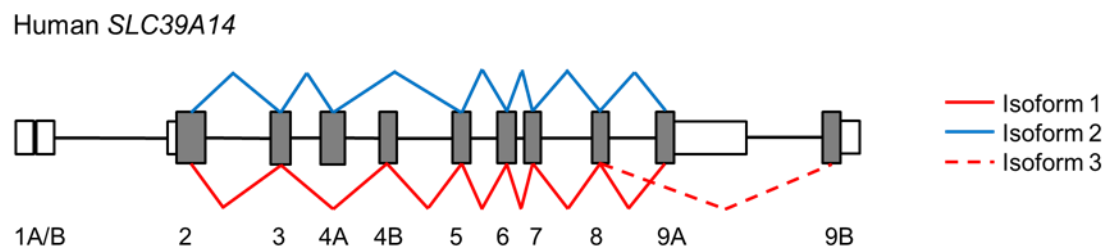

**Supplementary Figure 4. Schematic of the human *SLC39A14* gene.** *SLC39A14* is composed of nine exons, two of which (exon 4 and 9) can be alternatively spliced to generate three isoforms. Isoform 1 (NP\_001121903) is encoded by two different transcripts that have an alternative 5'UTR (NM\_001128431.2 and NM\_001135153.1). Isoform 2 (NP\_056174) is encoded by one transcript only (NM\_015359.4). Isoform 1 and 2 span 492 amino acids and differ by 20 amino acids encoded by an alternatively spliced exon four (4A and 4B). Transcript NM\_001135154.1 which encodes isoform 3 (NP\_001128626) has an alternative exon nine but shares the remaining protein sequence with isoform 1. Coding exons in grey, untranslated regions unshaded (not drawn to scale).

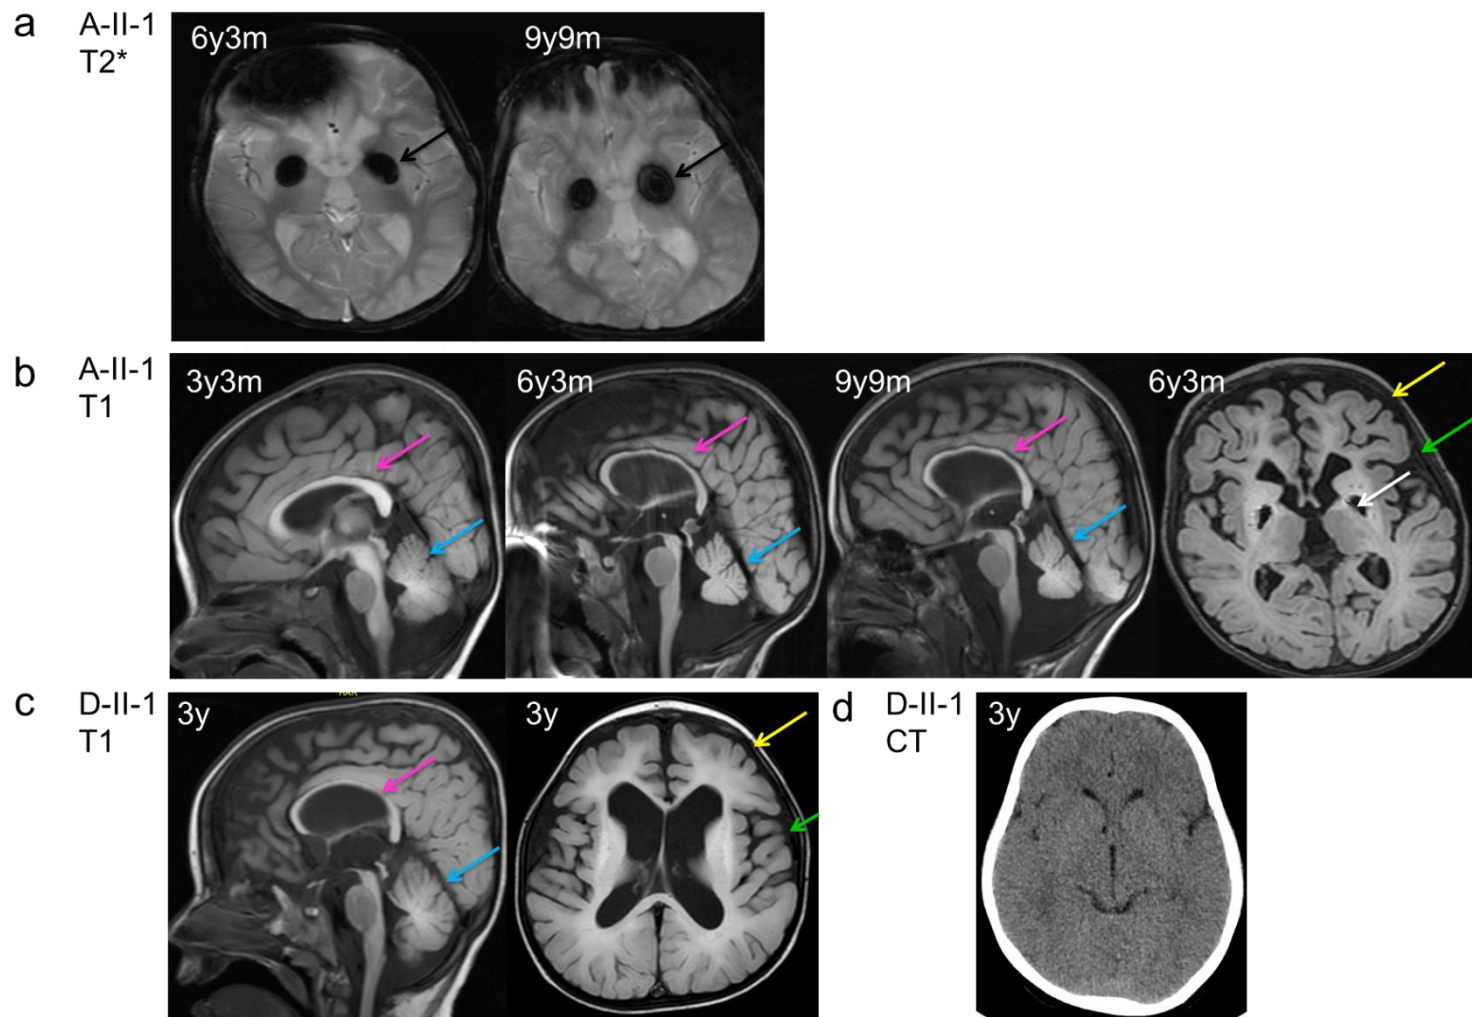

**Supplementary Figure 5. Additional MRI brain features of individuals with mutations in *SLC39A14*.** (a) Serial T2-weighted imaging of individual A-II-1 shows progressive signal hypointensity within the globus pallidus over time (black arrow). (b) and (c) Some patients develop cortical atrophy (yellow arrows), cerebellar atrophy (blue arrows) with thinning of the corpus callosum (pink arrows) and widening of the extracerebral spaces (green arrows). Note hyperintense signal within the basal ganglia associated with central pallidal signal hypointensity due to extreme T2 effects dominating the central region of the pallidum on the T1-weighted image (white arrow). (d) CT brain imaging of individual D-II-1 is normal.



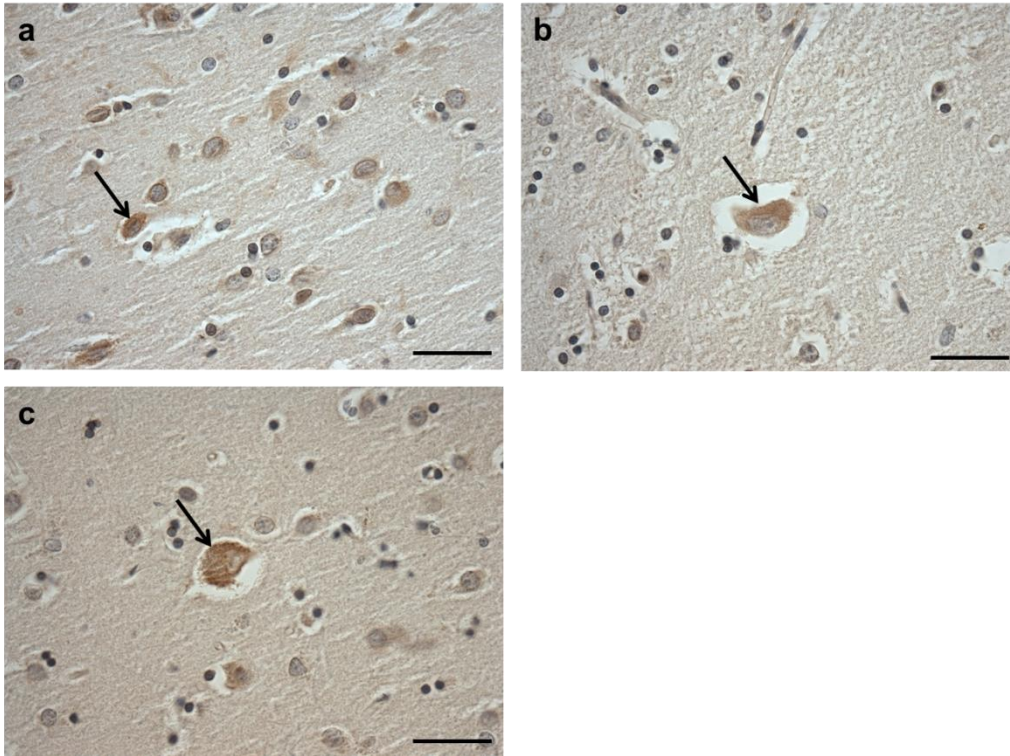

**Supplementary Figure 6. SLC39A14 is expressed in large neurons of the insular cortex, the caudate nucleus and putamen.** Immunostaining for human SLC39A14 demonstrates expression in neurons of the (a) insular cortex, (b) caudate nucleus, (c) putamen. Arrows pointing at positively stained neurons. Rabbit polyclonal anti-SLC39A14 antibody (1:1000, NBP1-81551, Novus). Scale bar 100  $\mu$ m.

```

Exon4A   TGTGGGGCTTTGGTTTCTCAGTGTCTCACTGATTAACTGGCCTCTCCTCTGGGAGTCC 60
Exon4B   TGTGGGGATACGGTCTCCTCTGTGTGACCGTCATCTCCTCTGCTCCCTCCTGGGGCCA 60
***** *  *** *  *** ***** *  *  *  ***  *** ***** *  *

Exon4A   TCGTCC TGCCCTGCACAGAGAAAGCGTTTTTCAGCCGTGTGCTCACTTACTTCATCGCC 120
Exon4B   GCGTGGTGCCCTTCATGAAGAAGACCTTTTTACAAGAGGCTGCTGCTCTACTTCATAGCTC 120
***  ***** *  *** *  ***** *  ***** *  ***** ***** ** *

Exon4A   TGTCCATTGGAACGCTGCTGCTTAACGGCTATTCCAGCTCATCCAGAG 170
Exon4B   TGGCGATTGGAACCTCTACTCCAACGCCCTTCCAGCTCATCCCGAG 170
** *  ***** **  *  ***** *  ***** ***** *****

```

**Supplementary Figure 7. Alignment of human SLC39A14 exon 4A and 4B.** Nucleotide sequences used to generate this alignment are NM\_015359.4 (exon 4A) encoding isoform 2 and NM\_001128431.2 (exon 4B) encoding isoform 1. Nucleotides differing between the two exons are highlighted in yellow. Primers used for RT-PCR are underlined (**Supplementary Table 3**).

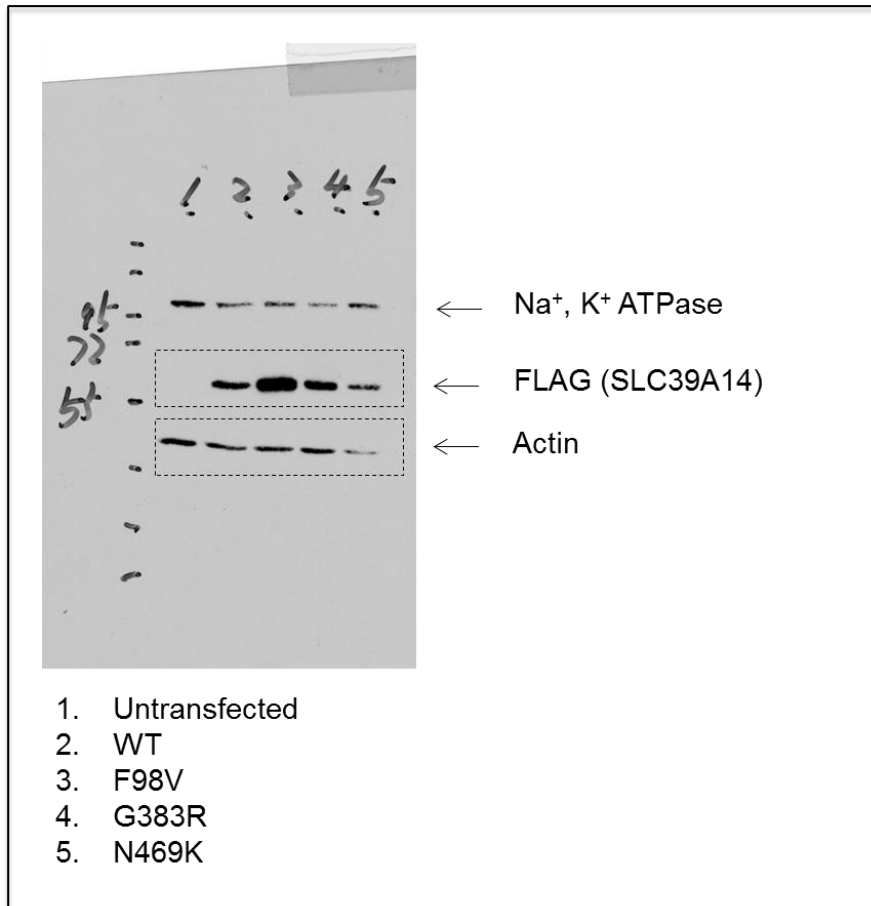

**Supplementary Figure 8. Full length immunoblot of whole cell lysates of stably transfected HEK-293 cells showing expression of the wild-type and three mutant SLC39A14 proteins.** Actin and Na<sup>+</sup>, K<sup>+</sup> ATPase were used as a loading control. The blot was first incubated with mouse anti-FLAG antibody to detect SLC39A14 followed by incubation with mouse anti-Actin antibody and mouse anti Na<sup>+</sup>, K<sup>+</sup> ATPase. Areas of the cropped image are indicated by dashed boxes.

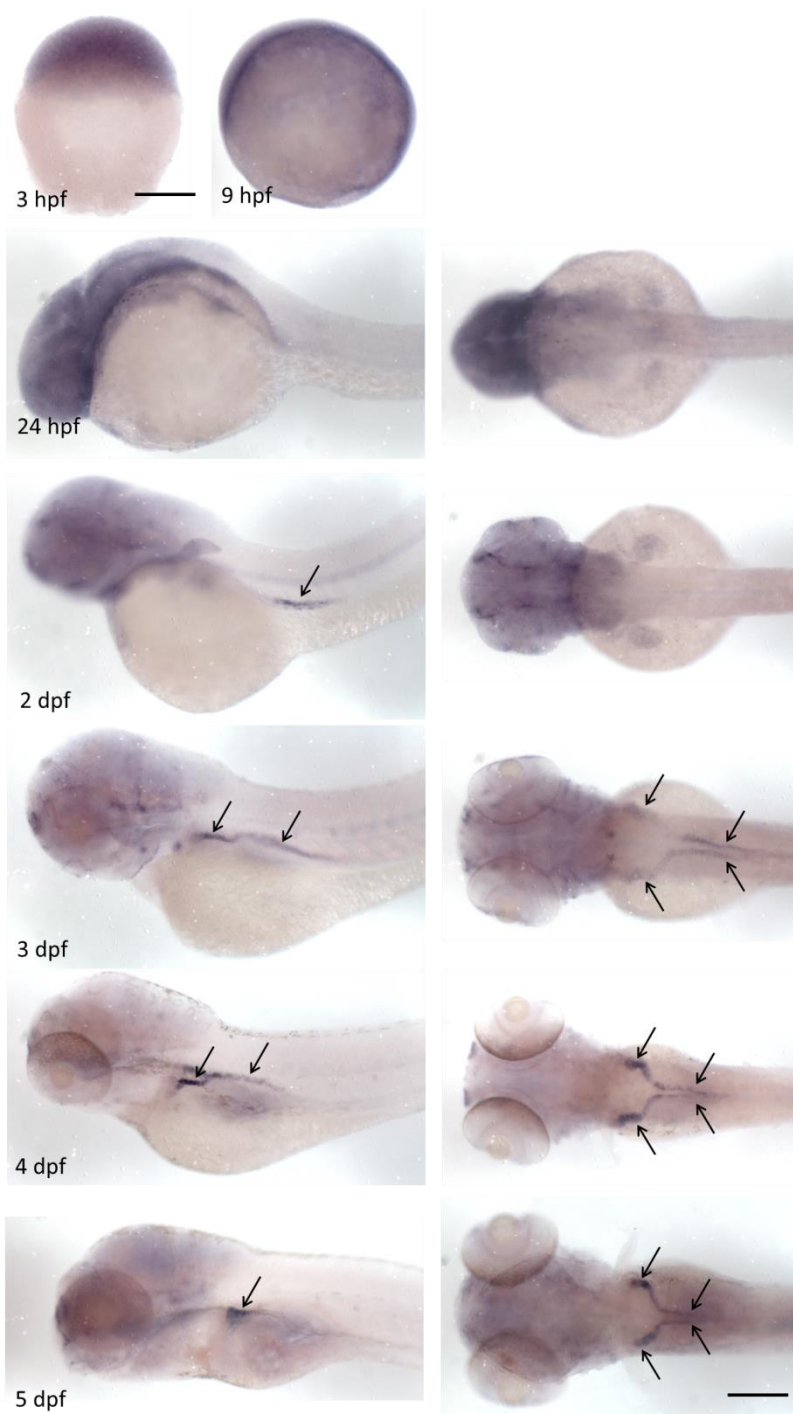

**Supplementary Figure 9. Time course of *slc39a14* expression during embryonic and early larval development in zebrafish.** Whole mount *in situ* hybridisation using a DIG-labelled anti-sense RNA probe shows prominent expression of *slc39a14* in the proximal convoluted and straight pronephric tubules (arrows) from 2 dpf. Scale bar 200  $\mu$ m.



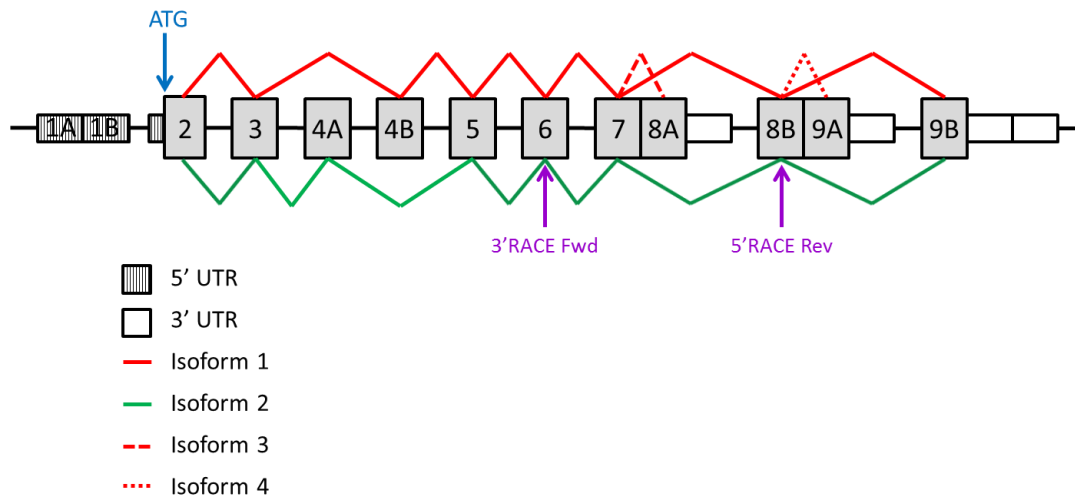

**Supplementary Figure 10. Schematic of zebrafish *slc39a14*.** 5' and 3' RACE using RNA extracted from zebrafish larvae at 3 dpf identified four alternative transcripts. Isoform 1 (red) and 2 (blue) are encoded by an alternatively spliced exon four. Isoform 3 (dotted red) is encoded by an alternative ninth exon and 3' UTR. Isoform 4 (dashed red) is encoded by a shorter transcript with only eight exons (not drawn to scale). The ATG start codon is marked in blue, gene specific inner primers used for 5' and 3' RACE are marked in purple.

```

HS MKLLLHPAFQSCLLTLLGLWRTPPEAHASSLGAPAI SAASFLODLI HRYGEGDSLTLQ 60
DR MTLRRASGCRQLTLTIGLALTLLGLLQWPIGDVVRGQDGASPAQVLQELLTRYGDNASISVP 60
  * * . * * : * . . * . * . . * : * * * . * : :
HS QLKALLNHLDVGVGRGNVTQHVQGHRNLSTCFSSGDLFTA HNFSEQSRIGSSELQEF CPT 120
DR QLRSLLVRLNGGQSEHDHDKTQPTRTNASKCLAA-DTLAVYGMSEQSRIDERGLQQICPT 119
  * : * * . * * . . : : : * * * : * : . . : * * * * . * : : * *
HS IIQQLDSRACTSENQENEENEQTEEGRPSAVEVWGYGLLCVTVISLCSLLGASVVPFMK 180
DR MIQQLDSQACKT--QPNQSESSP--RPTEAEVWGYGLLCVTVISLCSLVGASVVPFMRK 175
  . : * * * * : * : * * * * : * : * * * * * * * * * * * * * * * * * *
HS TFKRLLLYFIALAIGTLYSNALFQLIPEAFGFNPLEDY YVSKSAVVFGGFYLFFFTEKI 240
DR TFKRLLLYFIALAIGTLYSNALFQLIPEAFGFDPMEDY YVPKSAVVFGGFYLFFFTEKI 235
  * * * * * * * * * * * * * * * * * * * * * * * * * * * * * * * * * *
HS LKILLKQKNE--HHGHSHYASESLP-SKKDQEEGVMEKLQNGDLDHMIPQHCSSEL D GK 297
DR LKMILKPKDTGGHGHGHSHFPAERYANSNGDLEDGVMEKLQNGEAGGAALP--RAEADGR 293
  * * : * * * : * * * * * : * * . * : * * : * * * * * * * * . : * * :
HS APMVDEKVI VGLSVQDLQAS----QSACYWLKGVRYSDIGTLAWMITLSDGLHNFIDGL 353
DR GVGEDDKMLSTGQTVQDTQSSGGGGTGGCYWLKGRAYSDIGTLAWMITLSDGLHNFIDGL 353
  . * : * : . : * * * * * . . * * * * * * * * * * * * * * * * * *
HS AIGASFTVSVFQGISSTVAILCEEFPHELGD FVILLNAGMSIQQALFFNFLSACCCYLGL 413
DR AIGASFTASVFQGISSTVAILCEEFPHELGD FVILLNAGMSIQQALFFNFLSACCCYLG 413
  * * * * * . * * * * * * * * * * * * * * * * * * * * * * * * * * *
HS AFGILAGSHFSANWIFALAGGMFLYISLADMFPEMNEVCQEDERKGS--ILIPFTIQNLG 471
DR GFGILAGNNFSPNWIFALAGGMFLYIALADMFPEMNEVSREEEAGGSGFLLTFALQNAG 473
  * * * * * . * * . * * * * * * * * * * * * * * * * * * . * : * * : * * *
HS LLTGFTIMVVLTMYSGQIQIG 492
DR LLTGFAIMLVLTLYSGQIQIG 494
  * * * * * : * * : * * * * * * * * *

```

**Supplementary Figure 11. Zebrafish Slc39a14 shares 62 percent sequence identity with human SLC39A14.** Sequence alignment of human (top) and zebrafish (bottom) SLC39A14 protein sequence. Protein sequences of human isoform 1 (NP\_001121903.1) and zebrafish isoform 1 (XP\_001340102.4) were aligned using ClustalW2 (<http://www.ebi.ac.uk/Tools/msa/clustalw2/>). Residues identical to the human SLC39A14 sequence are marked in yellow with an asterisk (\*). Conservation between amino acids of strongly and weakly similar properties is indicated by a colon (:, dark grey) and a period (. light grey), respectively. The putative transmembrane domains are underlined. The histidine-rich region and the LZT consensus motif are highlighted in red. The position of the CRISPR induced deletion is indicated in turquoise. HS, homo sapiens; DR, danio rerio.

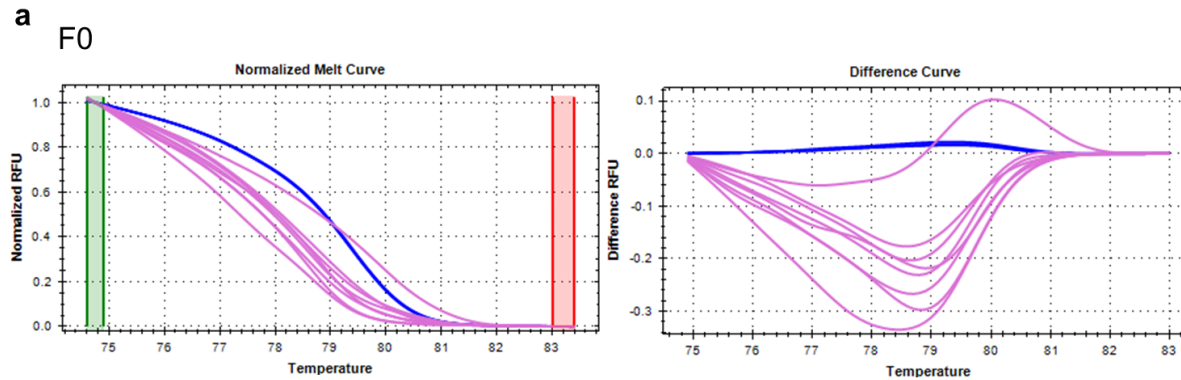

**b** F1

```

cctgtatgtagGCCTTCGGGTTTGACCCCA TGGAGGATTATTATGTGCCCAA WT
cctgtatgtagGCCTTCGGGTTTGACCC-A TGGAGGATTATTATGTGCCCAA Δ1
cctgtatgtagGCCTTCGGGTTTGACC--A TGGAGGATTATTATGTGCCCAA Δ2
cctgtatgtagGCCTTCGGGTTT---CCA TGGAGGATTATTATGTGCCCAA Δ4
cctgtatgtagGCCTTCGGGTTT-----GAGGATTATTATGTGCCCAA Δ9
cctgtatgtagGCCTTCGGGTTTGA-----TTATGTGCCCAA Δ15
cctgtatgtagGCCTTCGGGTTTGA GAGGATTAATAATCCA TGGAGGATTAT Δ2, Ins13

```

*slc39a14*<sup>U801</sup> mutant: c.629\_630del, p.P210Hfs\*48

**Supplementary Figure 12. CRISPR induced mutagenesis of zebrafish *slc39a14*.** (a) High Resolution Melting Analysis (HRMA) shows that co-injection of a gRNA to exon 5 (target sequence 5' GGCCTTCGGGTTTGACCCCA 3') and Cas9 mRNA results in a high somatic mutagenesis rate (>90%) in zebrafish embryos at 1 dpf (F0 generation). Normalized melt curve (left) and difference curve (right) show differences in the melt curve shape between un-injected wild-type (blue) and (purple) injected embryos. The green and red boxes indicate stable pre- and post-melt fluorescence intensity used for data normalisation. RFU, relative fluorescence units. (b) CRISPR induced indel mutations identified in the F1 generation. Wild-type (WT) sequence given in the top row. gRNA target sequence highlighted in yellow; insertions in grey; -, single nucleotide deletion; Δ, number of deleted base-pairs. The *slc39a14*<sup>U801</sup> mutant is highlighted by a red box.

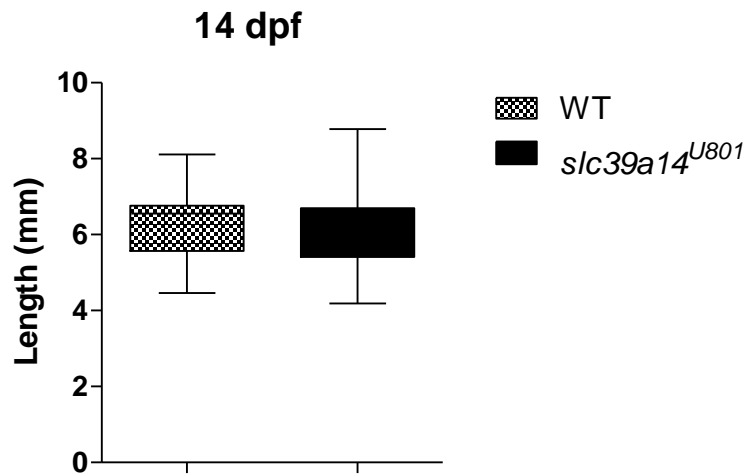

**Supplementary Figure 13. *Slc39a14*<sup>U801</sup> mutants do not show differences in size compared to wild-types.** Plots of the larval length of wild-type (WT, n=56) and *slc39a14*<sup>U801</sup> (n=64) zebrafish at 14 dpf show no significant difference. The box and whisker plots indicate the 25<sup>th</sup> and 75<sup>th</sup> percentile, and the minimum and maximum length, respectively. Statistical analysis was performed using Student's *t* test (p=0.062).

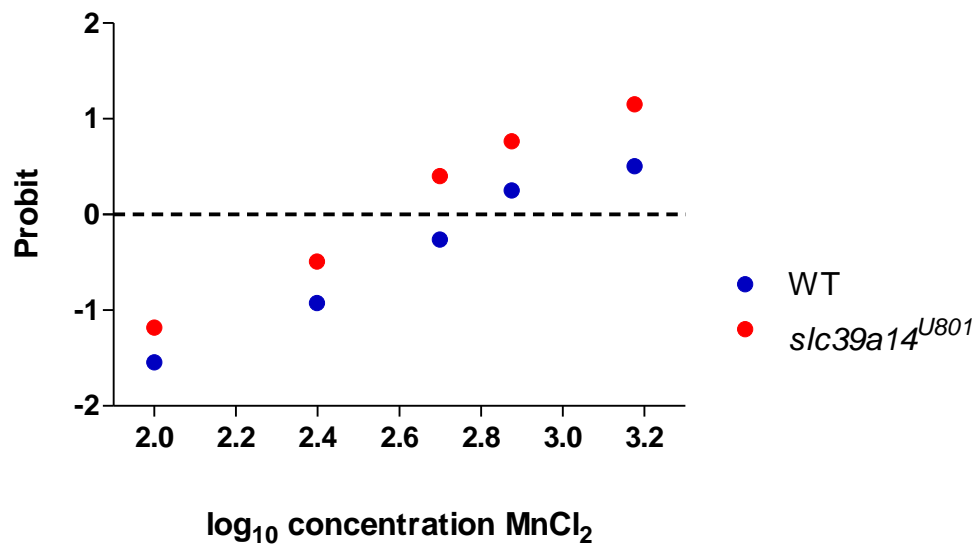

**Supplementary Figure 14. *Homozygous slc39a14*<sup>U801</sup> mutants are more sensitive to *MnCl*<sub>2</sub> toxicity compared to wild-type larvae.** Graph showing the dose-response curves for wild-type (red) and mutant (blue) larvae determined by Probit analysis using IBM SPSS Statistics package version 21. The logarithmic concentration of *MnCl*<sub>2</sub> (x-axis) is plotted against the determined Probit (probability unit, y-axis). The Probit of 0 is used to determine the LC<sub>50</sub> concentration.

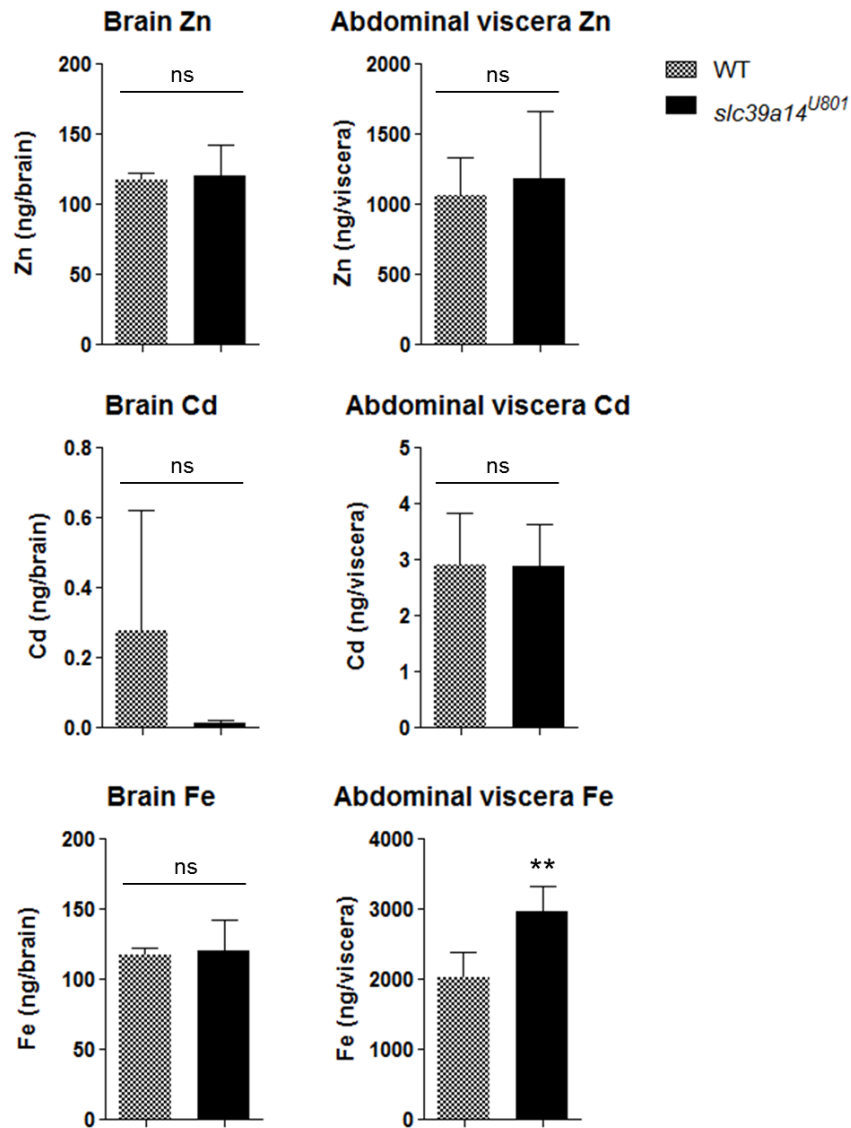

**Supplementary Figure 15. Metal levels in adult tissues of wild-type and homozygous *slc39a14<sup>U801</sup>* zebrafish.** There is no difference in Zn and Cd levels between *slc39a14<sup>U801</sup>* mutants and wild-types (WT). While Fe levels are not altered in the brain ( $p=0.74$  [Zn],  $p=0.4$  [Cd],  $p=0.88$  [Fe]), there is an increase in Fe concentration in abdominal viscera of mutant fish ( $p=0.66$  [Zn],  $p=0.96$  [Cd],  $p=0.0037$  [Fe]). Measurements were taken from pools of four brains / abdominal viscera. Data are presented as means  $\pm$  s.d. from two independent experiments. Statistical analysis was performed using Student's two tailed  $t$  test (\*\* $p<0.01$ ; ns, not significant).

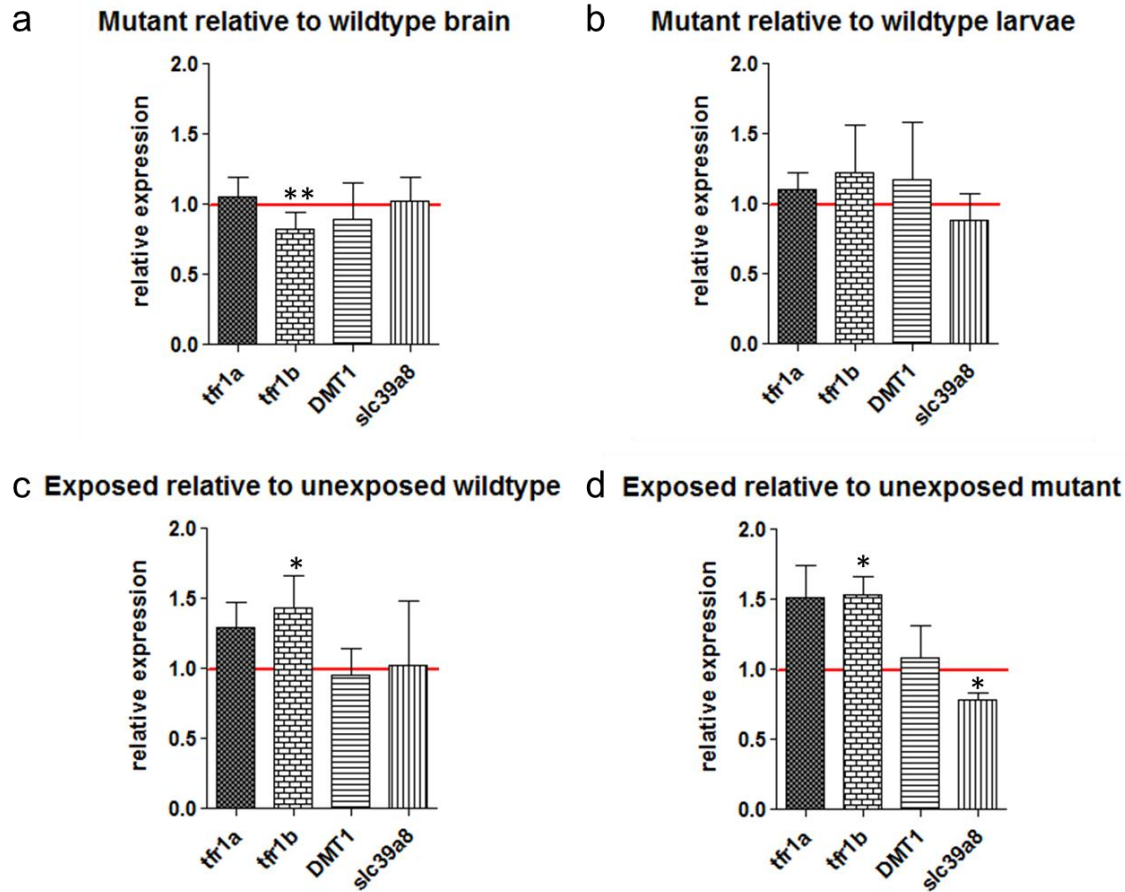

**Supplementary Figure 16. Graph showing Mn uptake transporter gene expression (*tfr1a*, *tfr1b*, *DMT1*, *slc39a8*) in homozygous *slc39a14<sup>U801</sup>* mutants relative to wild-type zebrafish. (a) *tfr1b* expression is reduced in mutant brain ( $p=0.005$ ) while there is no change for *tfr1a*, *DMT1* and *slc39a8* expression ( $p=0.83/0.36/0.89$ ). (b) No changes in transporter transcript levels are seen in mutant relative to wild-type larvae at 5 dpf ( $p=0.72/0.35/0.41/0.072$ ). (c) and (d) Mn exposure ( $50\mu\text{M MnCl}_2$  from 2 to 5 dpf) of zebrafish larvae leads to upregulation of *tfr1b* expression in both wild-type ( $p=0.042$ ) and mutant zebrafish ( $p=0.038$ ) at 5 dpf while *slc39a8* transcript levels are reduced in mutant larvae only ( $p=0.049$ ). Data are presented as means  $\pm$  s.d. from three independent experiments. Statistical analysis was performed using Student's two tailed *t* test on individual  $\Delta\text{Ct}$  values (\* $p<0.05$ , \*\* $p<0.01$ ).**



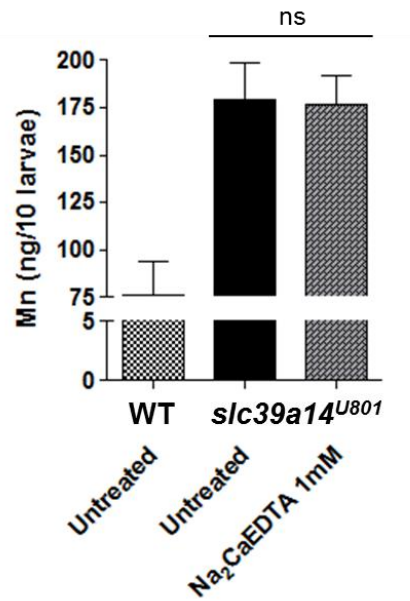

**Supplementary Figure 17. Immersion of *slc39a14*<sup>U801</sup> larvae in Na<sub>2</sub>CaEDTA does not reduce Mn levels.** Graph shows Mn levels of wild-type (WT) and *slc39a14*<sup>U801</sup> larvae exposed to 50  $\mu$ M MnCl<sub>2</sub> from 2 to 5 dpf. At 5 dpf larvae were transferred to standard fish water without addition of MnCl<sub>2</sub>. *slc39a14*<sup>U801</sup> larvae were supplemented with 1mM Na<sub>2</sub>CaEDTA between 5 and 7 dpf. Mn levels measured in pools of 10 larvae at 7 dpf did not show differences between Na<sub>2</sub>CaEDTA treated and untreated larvae. Data are presented as means  $\pm$  s.d. from three independent experiments. Statistical analysis was performed using one way ANOVA and Tukey multiple comparisons test (ns, not significant; p=0.98).

## Supplementary Tables

| Gene                  | Locus           | Phenotype                                                      | Changes                                                                                                                                  | DNA level                                                                                                              | Protein level                                                                                                    | MAF                                                           | ExAC                                                                                                    | Status                                                             | PolyPhen2                                                                                      | SIFT                                                                                              | PROVEAN                        |
|-----------------------|-----------------|----------------------------------------------------------------|------------------------------------------------------------------------------------------------------------------------------------------|------------------------------------------------------------------------------------------------------------------------|------------------------------------------------------------------------------------------------------------------|---------------------------------------------------------------|---------------------------------------------------------------------------------------------------------|--------------------------------------------------------------------|------------------------------------------------------------------------------------------------|---------------------------------------------------------------------------------------------------|--------------------------------|
| <b>Patient B-II-4</b> |                 |                                                                |                                                                                                                                          |                                                                                                                        |                                                                                                                  |                                                               |                                                                                                         |                                                                    |                                                                                                |                                                                                                   |                                |
| <b>SCNA</b>           | PARK1/<br>PARK4 | PD 1/PD 4                                                      | none found                                                                                                                               | —                                                                                                                      | —                                                                                                                | —                                                             | —                                                                                                       | —                                                                  | —                                                                                              | —                                                                                                 | —                              |
| <b>PARK2</b>          | PARK2           | PD, juvenile, type 2                                           | none found                                                                                                                               | —                                                                                                                      | —                                                                                                                | —                                                             | —                                                                                                       | —                                                                  | —                                                                                              | —                                                                                                 | —                              |
| <b>PINK1</b>          | PARK6           | PD 6, early onset                                              | rs2298298<br>rs3131713<br>rs686658                                                                                                       | c.388-7A>G<br>c.960-5G>A<br>c.*37A>T                                                                                   | NA<br>NA<br>NA                                                                                                   | 0.18(A)<br>0.18(G)<br>0.16(A)                                 | 0.862(G)<br>0.863(A)<br>0.136(A)                                                                        | hom<br>hom<br>hom                                                  | NA<br>NA<br>NA                                                                                 | NA<br>NA<br>NA                                                                                    | NA<br>NA<br>NA                 |
| <b>PARK7</b>          | PARK7           | PD 7, autosomal recessive early-onset                          | rs226249                                                                                                                                 | c.-99T>C                                                                                                               | NA                                                                                                               | 0.36(T)                                                       | —                                                                                                       | hom                                                                | NA                                                                                             | NA                                                                                                | NA                             |
| <b>LRRK2</b>          | PARK8           | PD 8                                                           | rs2256408<br>rs11564148<br>rs3761863                                                                                                     | c.149G>A<br>c.4939T>A<br>c.7190T>C                                                                                     | p.Arg50His<br>p.Ser1647Thr<br>p.Met2397Thr                                                                       | 0.03(G)<br>0.29(A)<br>0.45(T)                                 | 0.991(A)<br>0.298(A)<br>0.376(T)                                                                        | hom<br>hom<br>hom                                                  | B(0.000)<br>B(0.000)<br>B(0.000)                                                               | T(1.000)<br>T(0.953)<br>T(0.466)                                                                  | N(0.94)<br>N(0.15)<br>N(-0.53) |
| <b>ATP13A2</b>        | PARK9           | Kufor-Rakeb syndrome                                           | rs7531163                                                                                                                                | c.3084-3C>T                                                                                                            | NA                                                                                                               | 0.31(A)                                                       | 0.215(A)                                                                                                | het                                                                | NA                                                                                             | NA                                                                                                | NA                             |
| <b>TAF1</b>           | PARK12          | Dystonia-Parkinsonism, X-linked                                | none found                                                                                                                               | —                                                                                                                      | —                                                                                                                | —                                                             | —                                                                                                       | —                                                                  | —                                                                                              | —                                                                                                 | —                              |
| <b>FBX07</b>          | PARK15          | PD 15, autosomal recessive                                     | none found                                                                                                                               | —                                                                                                                      | —                                                                                                                | —                                                             | —                                                                                                       | —                                                                  | —                                                                                              | —                                                                                                 | —                              |
| <b>VPS35</b>          | PARK17          | PD 17                                                          | none found                                                                                                                               | —                                                                                                                      | —                                                                                                                | —                                                             | —                                                                                                       | —                                                                  | —                                                                                              | —                                                                                                 | —                              |
| <b>DNAJC6</b>         | PARK19          | PD 19, juvenile-onset                                          | none found                                                                                                                               | —                                                                                                                      | —                                                                                                                | —                                                             | —                                                                                                       | —                                                                  | —                                                                                              | —                                                                                                 | —                              |
| <b>SYNJ1</b>          | PARK20          | PD 20, early-onset                                             | none found                                                                                                                               | —                                                                                                                      | —                                                                                                                | —                                                             | —                                                                                                       | —                                                                  | —                                                                                              | —                                                                                                 | —                              |
| <b>PRKRA</b>          | DYT16           | Dystonia 16                                                    | rs3997876<br>rs77419724<br>rs75862065<br>rs61999302<br>rs62176112<br>rs141354030<br>rs9406386<br>rs62176113<br>rs80197731<br>rs797021523 | c.*3C>T<br>c.677T>A<br>c.380C>T<br>c.173A>G<br>c.32C>T<br>c.22_23delGC<br>c.1A>C<br>c.-24G>A<br>c.-133C>G<br>c.-146C>G | NA<br>p.Ile226Asn<br>p.Pro127Leu<br>p.Asp58Gly<br>p.Pro11Leu<br>p.Ala8Argfs<br>p.Met1Leu<br>NA<br>NA<br>NA<br>NA | —<br>—<br>—<br>—<br>0.0457(A)<br>0.238(G)<br>—<br>—<br>—<br>— | 0.241(A)<br>0.163(T)<br>0.098(A)<br>0.043(C)<br>0.125(A)<br>0.364(GC)<br>0.462(G)<br>0.276(C)<br>—<br>— | het<br>het<br>het<br>het<br>het<br>het<br>het<br>het<br>het<br>het | NA<br>PD(0.996)<br>PD(1.000)<br>B(0.367)<br>B(0.001)<br>NA<br>B(0.000)<br>NA<br>NA<br>NA<br>NA | NA<br>D(0.013)<br>D(0.01)<br>D(0.172)<br>T(0.134)<br>NA<br>D(0.000)<br>NA<br>NA<br>NA<br>NA<br>NA |                                |
| <b>SLC6A3</b>         | —               | Parkinsonism-dystonia, infantile                               | none found                                                                                                                               | —                                                                                                                      | —                                                                                                                | —                                                             | —                                                                                                       | —                                                                  | —                                                                                              | —                                                                                                 | —                              |
| <b>SLC30A10</b>       | —               | Hyper manganeseemia with dystonia, polycythemia, and cirrhosis | none found                                                                                                                               | —                                                                                                                      | —                                                                                                                | —                                                             | —                                                                                                       | —                                                                  | —                                                                                              | —                                                                                                 | —                              |
| <b>SLC39A8</b>        | —               | Hypomanganeseemia, CDG IIa                                     | rs151371<br>rs11382393<br>rs35608353<br>rs151370                                                                                         | c.*270G>A<br>c.*262_263insC<br>c.*258G>A<br>c.*88T>C                                                                   | NA<br>NA<br>NA<br>NA                                                                                             | 0.499(T)<br>0.23((G)<br>0.498(T)<br>0.424(A)                  | —<br>—<br>—<br>—                                                                                        | het<br>hom<br>het<br>het                                           | NA<br>NA<br>NA<br>NA                                                                           | NA<br>NA<br>NA<br>NA                                                                              | NA<br>NA<br>NA<br>NA           |
| <b>Patient D-II-1</b> |                 |                                                                |                                                                                                                                          |                                                                                                                        |                                                                                                                  |                                                               |                                                                                                         |                                                                    |                                                                                                |                                                                                                   |                                |
| <b>SCNA</b>           | PARK1/<br>PARK4 | PD 1/PD 4                                                      | none found                                                                                                                               | —                                                                                                                      | —                                                                                                                | —                                                             | —                                                                                                       | —                                                                  | —                                                                                              | —                                                                                                 | —                              |
| <b>PARK2</b>          | PARK2           | PD, juvenile, type 2                                           | rs1801334                                                                                                                                | c.1180G>A                                                                                                              | p.Asp394Asn                                                                                                      | 0.01(T)                                                       | 0.026(T)                                                                                                | het                                                                | PD(0.556)                                                                                      | PD(0.077)                                                                                         | D(-3.35)                       |

|                       |                 |                                                                |               |                          |                                  |            |                      |     |           |           |           |
|-----------------------|-----------------|----------------------------------------------------------------|---------------|--------------------------|----------------------------------|------------|----------------------|-----|-----------|-----------|-----------|
| <b>PINK1</b>          | PARK6           | PD 6, early onset                                              | rs2298298     | c.388-7A>G               | NA                               | 0.18(A)    | 0.862(G)             | hom | NA        | NA        | NA        |
|                       |                 |                                                                | rs3131713     | c.960-5G>A               | NA                               | 0.18(G)    | 0.863(A)             | hom | NA        | NA        | NA        |
|                       |                 |                                                                | rs1043424     | c.1562A>C                | p.Asn521Thr                      | 0.30(C)    | 0.297(C)             | het | B(0.022)  | T(0.247)  | N(-0.94)  |
|                       |                 |                                                                | rs686658      | c.*37A>T                 | NA                               | 0.17(A)    | 0.136(A)             | hom | NA        | NA        | NA        |
|                       |                 |                                                                | rs513414      | c.*181C>G                | NA                               | 0.16(C)    | —                    | hom | NA        | NA        | NA        |
| rs1043443             | c.*196T>C       | NA                                                             | 0.30(C)       | —                        | het                              | NA         | NA                   | NA  |           |           |           |
| <b>PARK7</b>          | PARK7           | PD 7, autosomal recessive early-onset                          | none found    | —                        | —                                | —          | —                    | —   | —         | —         | —         |
| <b>LRRK2</b>          | PARK8           | PD 8                                                           | rs2256408     | c.149G>A                 | p.Arg50His                       | 0.03(G)    | 0.991(A)             | hom | B(0.000)  | T(1.000)  | N(0.94)   |
| <b>ATP13A2</b>        | PARK9           | Kufor-Rakeb syndrome                                           | rs15786       | c.*124C>T;               | NA                               | 0.01(A)    | 0.079(A)             | het | B(0.099)  | D(0.000)  | N(0.38)   |
| <b>TAF1</b>           | PARK12          | Dystonia-Parkinsonism, X-linked                                | none found    | —                        | —                                | —          | —                    | —   | —         | —         | —         |
| <b>FBX07</b>          | PARK15          | PD 15, autosomal recessive                                     | none found    | —                        | —                                | —          | —                    | —   | —         | —         | —         |
| <b>VPS35</b>          | PARK17          | PD 17                                                          | none found    | —                        | —                                | —          | —                    | —   | —         | —         | —         |
| <b>DNAJC6</b>         | PARK19          | PD 19, juvenile-onset                                          | none found    | —                        | —                                | —          | —                    | —   | —         | —         | —         |
| <b>SYNJ1</b>          | PARK20          | PD 20, early-onset                                             | rs71640263    | c.4215_4216insAAT<br>ACT | p.Val1405_Leu14<br>06insAsnThr   | 0.43(A)    | 8.3e-<br>06(AAGTACT) | Het | NA        | NA        | NA        |
|                       |                 |                                                                | rs2833929     | c.3635-7G>T              | NA                               | 0.29(A)    | 0.288(A)             | het | NA        | NA        | NA        |
|                       |                 |                                                                | rs2254562     | c.1001A>G                | p.Lys334Arg                      | 0.30(C)    | 0.293(C)             | het | PD(0.992) | T(0.117)  | N(-1.54)  |
|                       |                 |                                                                | rs3997876     | c.*3C>T                  | NA                               | —          | 0.241(A)             | het | NA        | NA        | NA        |
| <b>PRKRA</b>          | DYT16           | Dystonia 16                                                    | rs77419724    | c.677T>A                 | p.Ile226Asn                      | —          | 0.163(T)             | het | PD(0.996) | D(0.013)  | D(-4.72)  |
|                       |                 |                                                                | rs75862065    | c.380C>T                 | p.Pro127Leu                      | —          | 0.098(A)             | het | PD(1.000) | D(0.01)   | D(-8.60)  |
|                       |                 |                                                                | rs61999302    | c.173A>G                 | p.Asp58Gly                       | —          | 0.043(C)             | het | B(0.367)  | D(0.172)  | D(-2.48)  |
|                       |                 |                                                                | rs62176112    | c.32C>T                  | p.Pro11Leu                       | 0.0457 (A) | 0.125 (A)            | het | B (0.001) | T (0.134) | N (0.72)  |
|                       |                 |                                                                | rs141354030   | c.22_23delGC             | p.Ala8Argfs                      | 0.238 (G)  | 0.364 (GC)           | het | NA        | NA        | NA        |
|                       |                 |                                                                | rs9406386     | c.1A>C                   | p.Met1Leu                        | —          | 0.462 (G)            | het | B (0.000) | D (0.000) | N (-0.77) |
|                       |                 |                                                                | rs62176113    | c.-24G>A                 | NA                               | —          | 0.276 (C)            | het | NA        | NA        | NA        |
|                       |                 |                                                                | rs80197731    | c.-133C>G                | NA                               | —          | —                    | het | NA        | NA        | NA        |
|                       |                 |                                                                | rs797021523   | c.-146C>G                | NA                               | —          | —                    | het | NA        | NA        | NA        |
|                       |                 |                                                                | <b>SLC6A3</b> | —                        | Parkinsonism-dystonia, infantile | none found | —                    | —   | —         | —         | —         |
| <b>SLC30A10</b>       | —               | Hyper manganeseemia with dystonia, polycythemia, and cirrhosis | none found    | —                        | —                                | —          | —                    | —   | —         | —         |           |
| <b>SLC39A8</b>        | —               | Hypomanganesemia, CDG II n                                     | rs151371      | c.*270G>A                | NA                               | 0.499 (T)  | —                    | het | NA        | NA        | NA        |
|                       |                 |                                                                | rs11382393    | c.*262_263insC           | NA                               | 0.231 (G)  | —                    | hom | NA        | NA        | NA        |
|                       |                 |                                                                | rs35608353    | c.*258G>A                | NA                               | 0.498 (T)  | —                    | het | NA        | NA        | NA        |
|                       |                 |                                                                | rs151370      | c.*88T>C                 | NA                               | 0.424 (A)  | —                    | het | NA        | NA        | NA        |
| <b>Patient E-II-4</b> |                 |                                                                |               |                          |                                  |            |                      |     |           |           |           |
| <b>SCNA</b>           | PARK1/<br>PARK4 | PD 1/PD 4                                                      | none found    | —                        | —                                | —          | —                    | —   | —         | —         | —         |
| <b>PARK2</b>          | PARK2           | PD, juvenile, type 2                                           | none found    | —                        | —                                | —          | —                    | —   | —         | —         | —         |
| <b>PINK1</b>          | PARK6           | PD 6, early onset                                              | rs2298298     | c.388-7A>G               | NA                               | 0.18 (A)   | 0.8623 (G)           | hom | NA        | NA        | NA        |
|                       |                 |                                                                | rs3131713     | c.960-5G>A               | NA                               | 0.18 (G)   | 0.8628 (A)           | hom | NA        | NA        | NA        |
| <b>PARK7</b>          | PARK7           | PD 7, autosomal recessive early-onset                          | none found    | —                        | —                                | —          | —                    | —   | —         | —         | —         |
| <b>LRRK2</b>          | PARK8           | PD 8                                                           | rs2256408     | c.149G>A                 | p.Arg50His                       | 0.03 (G)   | 0.9911 (A)           | hom | B (0.000) | T (1.000) | N (0.94)  |
|                       |                 |                                                                | rs10878307    | c.2167A>G                | p.Ile723Val                      | 0.04 (G)   | 0.05922 (G)          | hom | B (0.001) | T (0.805) | N (0.11)  |
| <b>ATP13A2</b>        | PARK9           | Kufor-Rakeb syndrome                                           | novel         | c.1180+7C>G*             | NA                               | —          | —                    | het | NA        | NA        | NA        |
| <b>TAF1</b>           | PARK12          | Dystonia-Parkinsonism, X-linked                                | none found    | —                        | —                                | —          | —                    | —   | —         | —         | —         |

|                 |        |                                                                |            |             |    |          |             |     |    |    |    |    |
|-----------------|--------|----------------------------------------------------------------|------------|-------------|----|----------|-------------|-----|----|----|----|----|
| <b>FBX07</b>    | PARK15 | PD 15, autosomal recessive                                     | none found | —           | —  | —        | —           | —   | —  | —  | —  | —  |
| <b>VPS35</b>    | PARK17 | PD 17                                                          | none found | —           | —  | —        | —           | —   | —  | —  | —  | —  |
| <b>DNAJC6</b>   | PARK19 | PD 19, juvenile-onset                                          | none found | —           | —  | —        | —           | —   | —  | —  | —  | —  |
| <b>SYNJ1</b>    | PARK20 | PD 20, early-onset                                             | rs844988   | c.1201-3A>T | NA | 0.11 (A) | 0.08051 (A) | het | NA | NA | NA | NA |
| <b>PRKRA</b>    | DYT16  | Dystonia 16                                                    | none found | —           | —  | —        | —           | —   | —  | —  | —  | —  |
| <b>SLC6A3</b>   | —      | Parkinsonism-dystonia, infantile                               | none found | —           | —  | —        | —           | —   | —  | —  | —  | —  |
| <b>SLC30A10</b> | —      | Hyper manganeseemia with dystonia, polycythemia, and cirrhosis | none found | —           | —  | —        | —           | —   | —  | —  | —  | —  |
| <b>SLC39A8</b>  | —      | Hypomanganesemia, CDG IIa                                      | none found | —           | —  | —        | —           | —   | —  | —  | —  | —  |

**Supplementary Table 1. Variants in known early onset Parkinson’s disease (PD) and Mn transporter disease genes identified on whole exome sequencing** MAF: minor allele frequency; NA: not applicable; het: heterozygous; hom: homozygous; B: benign; N: neutral; T: tolerated; \*Inappropriate segregation of this variant within this family confirmed by Sanger sequencing.

|        |     | White matter involvement <sup>1</sup>   | Deep grey matter involvement (T1) |         |                 |          | Deep grey matter involvement (T2) | Pituitary gland involvement | Cerebral/cerebellar atrophy |     |     |
|--------|-----|-----------------------------------------|-----------------------------------|---------|-----------------|----------|-----------------------------------|-----------------------------|-----------------------------|-----|-----|
|        |     | <i>Generalized hyperintensity on T1</i> | <i>Hyperintensity on T1</i>       |         |                 |          | <i>Hypointensity on T2</i>        | <i>Hyperintensity on T1</i> |                             |     |     |
|        |     |                                         | Caudate                           | Putamen | Globus pallidus | Thalamus | Globus pallidus                   |                             |                             |     |     |
|        |     | Axial/Sagittal images                   | Axial images                      |         |                 |          | Axial images                      | Sagittal images             | Sagittal/Coronal images     |     |     |
|        | Age |                                         |                                   |         |                 |          | T2                                | T2*                         | Flair                       |     |     |
| A-II-1 | 3   | ++ <sup>2</sup>                         | +                                 | +       | ++              | -        | ++                                | N/A                         | ++                          | +/- | -   |
|        | 6   | ++ <sup>2</sup>                         | ++                                | ++      | +++             | -        | +                                 | ++                          | +                           | +   | +   |
|        | 9   | +++ <sup>2</sup>                        | N/A                               | N/A     | N/A             | N/A      | +                                 | +++                         | +                           | +   | ++  |
| B-II-4 | 2   | ++                                      | +                                 | +       | ++              | -        | + <sup>3</sup>                    | N/A                         | ++                          | +   | -   |
| C-II-2 | 3   | ++                                      | +                                 | +       | ++              | -        | ++                                | N/A                         | ++                          | ++  | -   |
| D-II-1 | 3   | +++                                     |                                   |         | +++             | -        |                                   |                             |                             | +   | +++ |
| E-II-2 | 2   | ++                                      | +                                 | +       | ++              | -        | ++                                | +                           | N/A                         | ++  | -   |
|        | 4   | ++                                      | +                                 | +       | ++              | -        | +                                 | +/-                         | N/A                         | ++  | -   |
|        | 17  | ++                                      | ++                                | ++      | ++              | -        | ++                                | +                           | N/A                         | ++  | -   |
| E-II-3 | 2   | ++                                      | +/-                               | +/-     | ++              | -        | +                                 | N/A                         | N/A                         | +   | -   |

**Supplementary Table 2. Neuroradiological features of individuals with mutations in *SLC39A14***

<sup>1</sup>Generalized white matter changes including involvement of the cerebellum, spinal cord, dorsal pons with sparing of the ventral pons

<sup>2</sup>Evidence of progressive cerebral atrophy especially involving frontal lobe and corpus callosum

<sup>3</sup>T2-weighted hypointensity associated with a central hyperintensity, similar to the eye-of-the-tiger sign, possibly due to “T1-shine through”

N/A – not available; (-) radiological feature absent; (+/-) radiological feature borderline; (+) radiological feature present; (++) radiological feature strongly present; (+++) radiological feature very strongly present

| Primer             | Sequence (5' → 3')      | Amplicon size (bp) | Annealing temperature (°C) |
|--------------------|-------------------------|--------------------|----------------------------|
| hSLC39A14_Exon2Fw  | TCAAGAAGGAGCAGAGAAGCA   | 480                | 60+/62*                    |
| hSLC39A14_Exon2Rv  | AGACAGGGAACCCTGAGAGG    |                    |                            |
| hSLC39A14_Exon3Fw  | TCCTCTGGGAAGGCTGAGTA    | 371                | 62+/60*                    |
| hSLC39A14_Exon3Rv  | CATTCAGTGAGGAGCAGCAG    |                    |                            |
| hSLC39A14_Exon4AFw | GAGTGTCCCCACCCTCAGT     | 298                | 60+/62*                    |
| hSLC39A14_Exon4ARv | GTAGGGGAGGAGGGGATTG     |                    |                            |
| hSLC39A14_Exon4BFw | GGCATGTGCCTTCTCTCC      | 300                | 60                         |
| hSLC39A14_Exon4BRv | CCTTCTATCCAAACGGAGGTC   |                    |                            |
| hSLC39A14_Exon5Fw  | AGGGGGATCAGTAAAGATGCT   | 242                | 60                         |
| hSLC39A14_Exon5Rv  | TGTTTGAGATGGGTGTTTTCC   |                    |                            |
| hSLC39A14_Exon6Fw  | AGCAGGTGCTCAATCAGGTT    | 328                | 60                         |
| hSLC39A14_Exon6Rv  | ACCATGTGCCCTCAAGGTAA    |                    |                            |
| hSLC39A14_Exon7Fw  | GGCTTACCTTGAGGGCACAT    | 377                | 60                         |
| hSLC39A14_Exon7Rv  | GCACTGTGAAGACAGGGAGA    |                    |                            |
| hSLC39A14_Exon8Fw  | CCATGCCCATCTTACTCTTCC   | 299                | 60                         |
| hSLC39A14_Exon8Rv  | ACCTAACATCCATCCCCTTAG   |                    |                            |
| hSLC39A14_Exon9AFw | TTGCCCTGGACTTACAAGATG   | 297                | 60                         |
| hSLC39A14_Exon9ARv | GTGGTGCATTGTGGATGGT     |                    |                            |
| hSLC39A14_Exon9BFw | CGGCCATGTTTATGTTTTTG    | 299                | 60                         |
| hSLC39A14_Exon9BRv | CATCATGCAGTTAGGAAATACCA |                    |                            |

**Supplementary Table 3. Primer sequences used for PCR and sequencing of human *SLC39A14***

Primers cover the transcripts NM\_001128431.2, NM\_015359.4 and NM\_001135154.1. PCR was performed using either Taq DNA polymerase (Life Technologies) with the addition of Betaine (0.5M), cycling conditions: 95°C for 5 minutes; 35 cycles of 95°C for 30 seconds, specified annealing temperature (+) for 30 seconds, 72°C for 30 seconds; final cycle 72°C for 5 minutes; or Biomix Red (Bioline), cycling conditions: 95°C for 5 minutes, 35 cycles of 95°C for 45 seconds, specified annealing temperature (+) for 45 seconds, 72°C for 1 minute; final cycle 72°C for 5 minutes.



| Primer                       | Sequence (5' → 3')      | Amplicon size (bp) | Annealing temperature (°C) |
|------------------------------|-------------------------|--------------------|----------------------------|
| <b>hSLC39A14_RT_Exon3Fw</b>  | CGGAGAACCAGGAAAACGAGG   | 109                | 64                         |
| <b>hSLC39A14_RT_Exon4aRv</b> | GAGGCCAGGTTAATCAGTGAG   |                    |                            |
| <b>hSLC39A14_RT_Exon4bFw</b> | ACAAGAGGCTGCTGCTCTAC    | 139                | 64                         |
| <b>hSLC39A14_RT_Exon5Rv</b>  | CCAAACACCACTGCAGACTTGG  |                    |                            |
| <b>hHPRT_Fw</b>              | CCACGAAAGTGTGGATATAAGC  | 205                | 58                         |
| <b>hHPRT_Rv</b>              | GGCGATGTCAATAGGACTCCAGA |                    |                            |
| <b>zfSLC39A14_RT_Exon3Fw</b> | CCCTAGACCCACTGAAGCTG    | 240                | 58                         |
| <b>zfSLC39A14_RT_Exon5Rv</b> | GCGGACTTGGGCACATAATA    |                    |                            |

**Supplementary Table 4. Primer pairs for RT-PCR of human and zebrafish *SLC39A14***

Q5 High Fidelity DNA polymerase (NEB) was used with the addition of Q5 High GC Enhancer at 1X final concentration. Cycling conditions: 98°C for 30 seconds; 35 cycles of 98°C for 10 seconds, specific annealing temperature for 30 seconds, 72°C for 30 seconds per kb; final cycle 72°C for 2 minutes.

| Primer                                                            | Sequence (5' → 3')     | Amplicon size (bp) | Amplification efficiency (%) |
|-------------------------------------------------------------------|------------------------|--------------------|------------------------------|
| <b>zfSLC39A14_isoform1_Fw</b>                                     | CCTTTTACAAGCGGTTGCTGC  | 133                | 97.6                         |
| <b>zfSLC39A14_isoform1_Rv</b>                                     | GCGGACTTGGGCACATAATA   |                    |                              |
| <b>zfSLC39A14_isoform2_Fw</b>                                     | CGCGGTTTCATGCGCAGAGTT  | 136                | 97.8                         |
| <b>zfSLC39A14_isoform2_Rv</b>                                     | GCGGACTTGGGCACATAATA   |                    |                              |
| <b>zfSLC39A14_all_isoforms_Fw</b>                                 | CCCTAGACCCACTGAAGCTG   | 240                | 101.5                        |
| <b>zfSLC39A14_all_isoforms_Rv</b>                                 | GCGGACTTGGGCACATAATA   |                    |                              |
| <b>zfEf1alpha_Fw</b>                                              | GTA CTTCTCAGGCTGACTGTG | 136                | 98.2                         |
| <b>zfEf1alpha_Rv</b>                                              | ACGATCAGCTGTTTCACTCC   |                    |                              |
| <b>zfDMT1_Ex1_2_Fw</b>                                            | TTCCCAGCAAACAACGAGAC   | 101                | 106.9                        |
| <b>zfDMT1_Ex1_2_Rv</b>                                            | CCCACAGCCCAGATGTAGAG   |                    |                              |
| <b>zfSlc39a8_Ex2_3_Fw</b>                                         | GCCTGCCCTTACACTTCTTC   | 104                | 109.4                        |
| <b>zfSlc39a8_Ex2_3_Rv</b>                                         | GCAGCCAAGTTAATCACCGT   |                    |                              |
| <b>Dr_tfr1a_1_SG QuantiTect Primer Assay (Qiagen, QT02189621)</b> |                        |                    |                              |
| <b>Dr_tfr1b_1_SG QuantiTect Primer Assay (Qiagen, QT02196558)</b> |                        |                    |                              |

**Supplementary Table 5. Primers used for real-time PCR**

| Primer               | Sequence (5' → 3')                            |
|----------------------|-----------------------------------------------|
| InfFw_pCS2_hSLC39A14 | GCCTCTCGAGCCTCTAGAACT                         |
| InfRv_pCS2_hSLC39A14 | CCCAATCTGGATCTGTCCTGA                         |
| InfFW_EGFP           | <u>CAGATCCAGATTGGGGGTGGATCAGGAGGTGGC</u>      |
| InfRV_EGFP           | <u>AGAGGCTCGAGAGGCTTACTTGTACAGCTCGTCCATGC</u> |

**Supplementary Table 6. Primers used to generate EGFP tagged constructs of human SLC39A14 at the C-terminus.** 15 bp overhangs complementary to the ends of the linearized vector are underlined.

| Mutation      | Sequence (5' → 3')                           |
|---------------|----------------------------------------------|
| c.292T>G Fwd  | TTAGTTCTGGAGACCTC <u>G</u> TCACTGCCACACA     |
| c.292T>G Rev  | GAAATTGTGGGCAGTGAC <u>G</u> GAGGTCTCCAGA     |
| c.1147G>A Fwd | GTTCCACATGAGCTA <u>A</u> GAGACTTTGTCATCC     |
| c.1147G>A Rev | GGATGACAAAGTCTC <u>T</u> TAGCTCATGTGGGAAC    |
| c.1407C>G Fwd | TGATTCCATTTATCATCCAGAA <u>G</u> CTGGGCCTCCTG |
| c.1407C>G Rev | CAGGAGGCCCCAG <u>C</u> TCTGGATGATAAATGGAATCA |

**Supplementary Table 7. Primers used for site-directed mutagenesis.** Altered nucleotide is underlined.

|                  | Sequence (5' → 3')                                 |
|------------------|----------------------------------------------------|
| zfSLC39A14_Fw    | TCTCTGTGTTCACTGGTCGG                               |
| zfSLC39A14_Rv_T7 | <u>TAATACGACTCACTATAGGGTGGT</u> GAGTACAAGCATTATGGC |

**Supplementary Table 8. Primers used to generate an antisense DIG labelled RNA probe for whole mount *in situ* hybridisation.** Q5 High Fidelity DNA polymerase (NEB) was used for PCR amplification (annealing temperature 58°C) according to the manufacturer's recommendations. T7 promoter sequence underlined.

|                                 | <b>Sequence (5' → 3')</b> |
|---------------------------------|---------------------------|
| <b>5' RACE zfSLC39A14 outer</b> | CCAGCGCAATGTAGAGGAAC      |
| <b>5' RACE zfSLC39A14 inner</b> | GCAGGATCACAAAATCACCCA     |
| <b>3' RACE zfSLC39A14 outer</b> | ACTAATCCCAGAGGCCTTCG      |
| <b>3' RACE zfSLC39A14 inner</b> | CATGGGCACAGTCACTTTCC      |

**Supplementary Table 9. Zebrafish *slc39a14* specific primers used for 5' and 3' RACE**

## Supplementary Note 1

### Case descriptions

#### Family A

Family A are of Yemeni origin. Parents are distantly related with two affected daughters. Prenatal course, delivery and early infancy were normal for both siblings. The older sibling was reported to have onset of severe neurological deterioration from seven months of age. Her prominent clinical features at the age of nine years included progressive spasticity, dystonia, intellectual disability and microcephaly. She was using a wheelchair, made eye contact and tracked with her eyes, and had dystonia particularly affecting her mouth, face and neck. She had increased tone in all four limbs with prominent spasticity, especially at the ankles. Reflexes were brisk throughout with evidence of bilateral ankle clonus. A conjunctival biopsy at 18 months was normal. The younger female sibling had disease onset in infancy at a similar age to her older sister (six months). Examination at seven years old revealed that she was alert and responsive, seated in a supportive wheelchair, non-ambulatory, non-verbal, and unable to follow commands. She tracked with her eyes. She did not have the facial dystonia described in her older sister. Her facial movements were scant but symmetrical. She also had significant spasticity in all four limbs and increased reflexes and clonus in both ankles. She died at the age of eight years from a respiratory infection.

#### Family B

Family B originate from Egypt. The parents are first cousins and have two affected and two unaffected daughters. Both affected siblings were born by normal vaginal delivery and had an uneventful peri- and postnatal period. Following a normal initial neurodevelopment, both siblings presented with loss of previously acquired motor developmental milestones associated with increased irritability at seven months of age. This was followed by the development of generalized dystonia and bulbar dysfunction, bradykinesia, and axial hypotonia. No pyramidal tract signs were noted, and hearing and vision appeared normal. The older sibling passed away at the age of thirteen months. The cause of death is unknown. Unfortunately, the family was lost to follow up after the initial consultation and we have no further information on the progress of the second affected sibling.

#### Family C (Supplementary Movie 1-2)

Parents are second degree cousins from India and have one affected and one unaffected child. The affected girl was born by elective caesarean section and had an uneventful postnatal period. Her early developmental milestones were normal. At the age of three years she presented with clumsiness while writing and drawing. Shortly after, she developed toe walking and lost her ability to stand and walk unaided. By five years of age, she showed marked hypomimia, dystonic posturing of both lower limbs, tremor in her upper limbs and dyskinetic movements in both hands. She had increased tone in all four limbs associated with hyperreflexia, ankle clonus, bilateral extensor plantar reflexes and bilateral tendoachilles contractures. There were no cerebellar signs.

Intellectual ability was normal. There was no history of environmental Mn exposure. Nerve conduction studies and visual evoked potentials were normal. Treatment with baclofen, tetrabenazine and levodopa did not lead to significant improvement of symptoms. Once hypermanganesemia was confirmed she was commenced on monthly Na<sub>2</sub>CaEDTA infusions. Chelation treatment led to cessation of tremors and dyskinetic movements in her upper limbs and improvement of lower limb dystonic posturing. Despite residual dystonia in her lower limbs she regained the ability to walk independently wearing ankle foot orthoses. Currently, she receives monthly five day courses of Na<sub>2</sub>CaEDTA (500 mg twice daily), Zincovit (5 mL twice daily), Evion (400 mg daily), Vitamin C (500 mg daily), Tetrabenazine (6.25/12.5 mg twice daily), Baclofen (5 mg twice daily) and Tonoferon (5 mL daily).

#### Family D

The affected boy who is of Spanish ancestry is the only child of first cousin parents. He was born by normal vaginal delivery following an uncomplicated pregnancy. He presented with motor developmental delay, axial hypotonia, hypokinesia and macrocephaly at the age of ten months. This was followed by the development of generalized dystonia, lower limb hypertonia, irritability and episodic hyperthermia with hyperhidrosis. He suffered from dystonic crises with opisthotonus. He showed minimal improvement on levodopa, trihexyphenidyl, gabapentin and clonazepam. He did not achieve language development. He died at four years of age from *E. coli* septic shock with multiorgan failure following bronchopneumonia. Hypermanganesemia was persistent with values four to twenty times that of normal. Neither parent had hypermanganesemia and environmental Mn exposure was ruled out. He was found to have elevated creatine kinase (from normal to 3,023 U L<sup>-1</sup>) on occasions with normal electromyography (EMG). Metabolic screening included plasma amino acids, urine organic acids, CSF neurotransmitter amine metabolites and transferrin isoelectric focusing, all of which was negative. The only metabolic abnormality found was an impairment of the mitochondrial respiratory chain with deficiencies of complex III and V in muscle. Molecular analysis for recessive mitochondrial DNA mutations was negative.

#### Family E (Supplementary Movie 3-5)

Family E are of Lebanese origin with consanguineous first cousin parents. There are three affected children (17 year old girl, 16 year old girl and a 9 year old boy) and three unaffected children (all boys). All children were born following a normal pregnancy and birth and developmental milestones were normal until two to three years of age. All three affected children show a homogeneous clinical presentation predominated by a progressive and severe generalized dystonia. Initial presentation in all three children was with an abnormality in gait (unsteadiness and difficulty in independent walking) associated with lower limb dystonia, with features of symmetrical lower limb postural dystonia, toe walking, scissoring and plantar flexion. Over the next six to twelve months ambulation became increasingly difficult and the dystonia became more generalized in nature with involvement of the upper limbs (dystonic posturing, fisting). Oromandibular dystonia was also a prominent feature in all three children. Loss of ambulation occurred between seven and ten years of age and all children

developed limb contractures and scoliosis. All three children developed acquired microcephaly. There were no cerebellar features clinically and neuropsychiatric features have not been evident. There appears to be relative cognitive sparing (psychometric testing has not been possible) although a degree of learning disability is present in all children. Ophthalmological assessment, VEP and ERG were unremarkable. Nerve conduction and EMG were also normal. None of the children have shown clinical response to medication including levodopa up to 5 mg kg<sup>-1</sup> per day and benzodiazepines. There has been partial but poorly sustained response to trihexyphenidyl at high doses of 20 mg per day and intrathecal baclofen of 1,500-2,000 µg per day in the two older siblings.
